# Supplementary material for: Phenotypic effects of Am genomes in nascent synthetic hexaploids derived from interspecific crosses between durum and wild einkorn wheat
Source: PLOS journal article supplement (doi:10.1371/journal.pone.0284408), 2023-04-27
Supplement: S7 (10.1371/journal.pone.0284408.s007) [file journal.pone.0284408.s007]

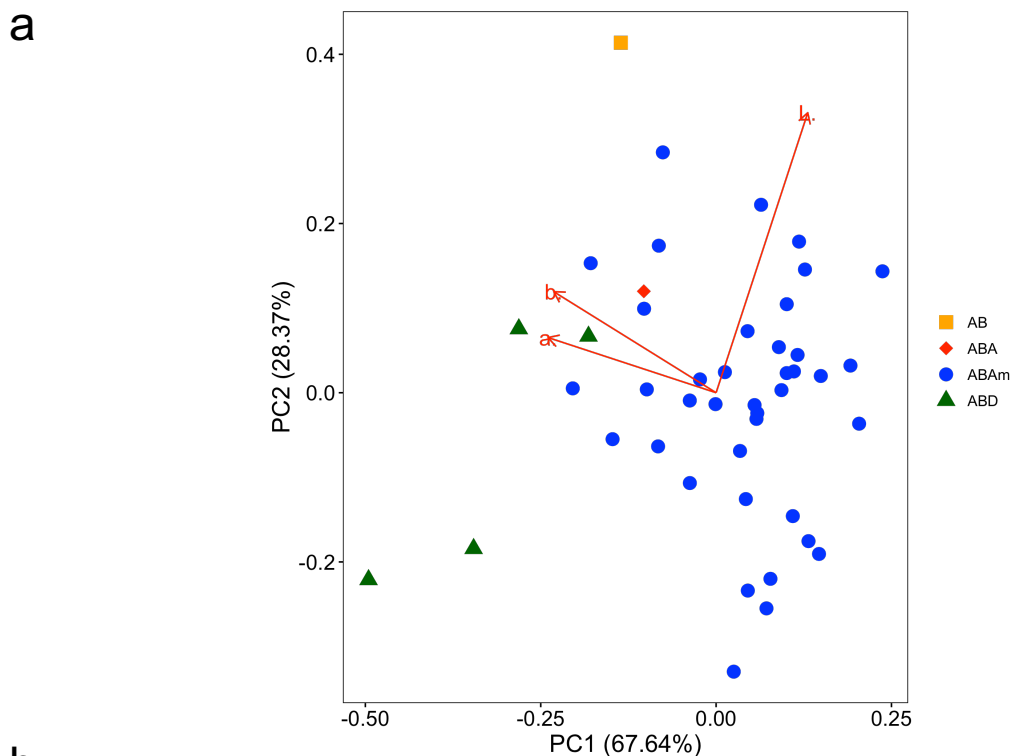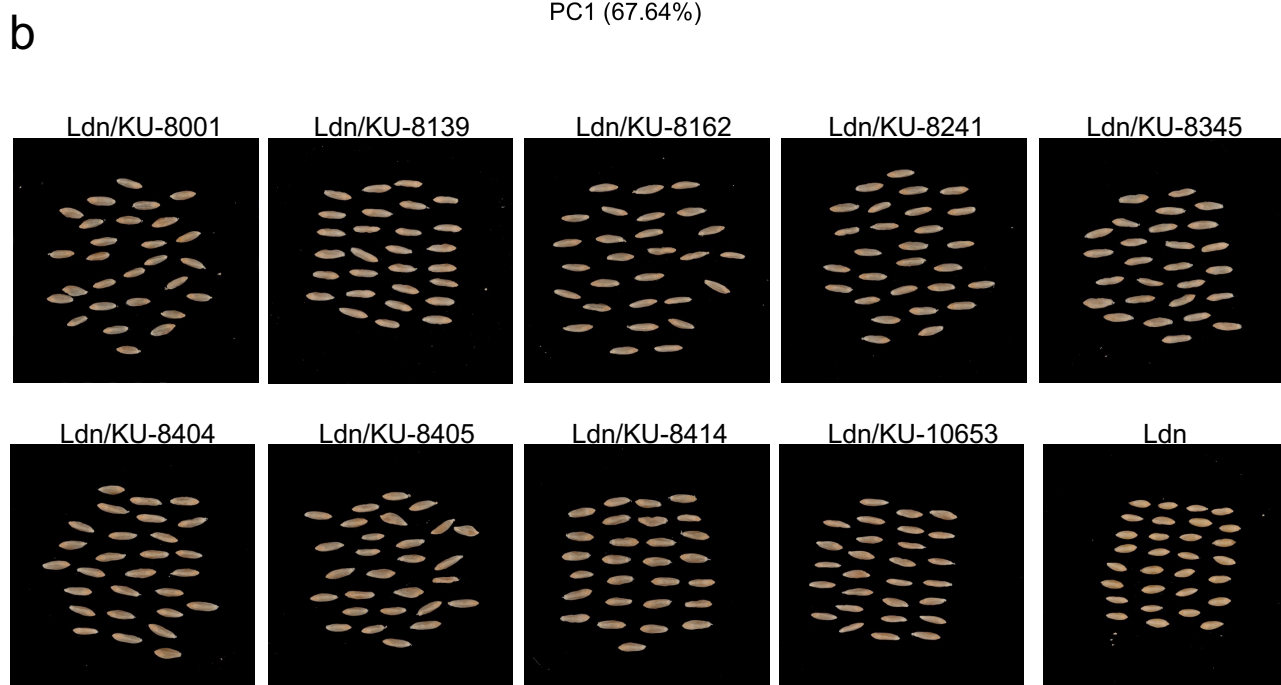

### S7 Fig. Seed colors of the AABBA<sup>m</sup>A<sup>m</sup> synthetic hexaploids

(a) Principal component analysis with the color of the grain surface (CIELab L\*, CIELab A\*, and CIELab B\*) of 39 synthetic hexaploid lines with the AABBA<sup>m</sup>A<sup>m</sup> genome (blue circle), one synthetic hexaploid line with the AABBA genome (red diamond), four synthetic hexaploid lines with the AABDD genome (green triangle), and Ldn (orange square). (b) Seed colors of the AABBA<sup>m</sup>A<sup>m</sup> synthetic hexaploids and Ldn.
